# Supplementary material for: Temperature-Specific and Sex-Specific Fitness Effects of Sympatric Mitochondrial and Mito-Nuclear Variation in Drosophila obscura
Source: MDPI journal article supplement (doi:10.3390/insects13020139), 2022-01-28
Supplement: s1 [file s1]

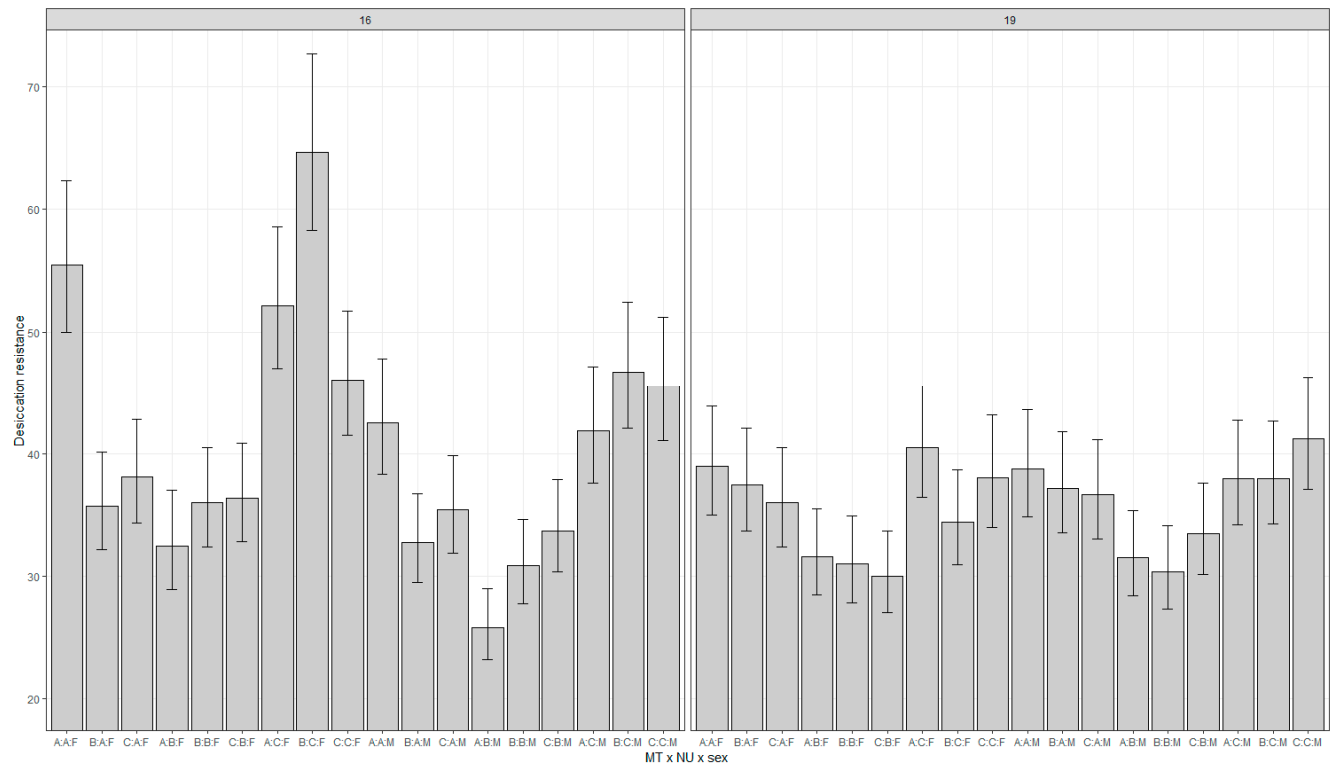

**Supplementary Figure S1.** Mean survival times in hours for the desiccation experiment for all combinations of genotypes and sex from the EB I on two experimental temperatures. A, B and C denote MNILs (the first letter marks mtDNA haplotype (MT), the second letter marks nuDNA background (NU)), F and M denote females and males, respectively (SEX). Error bars represent 95% confidence intervals.

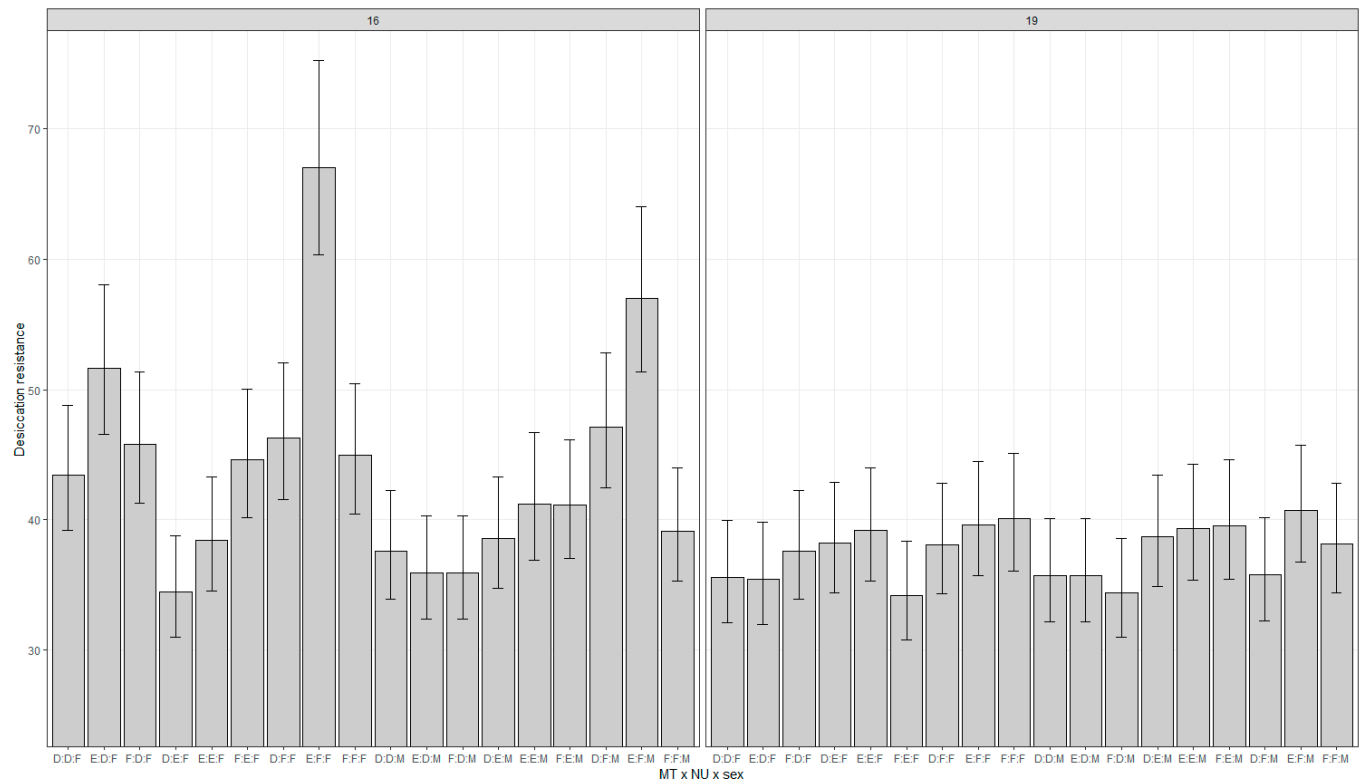

**Supplementary Figure S2.** Mean survival times in hours for the desiccation experiment for all combinations of genotypes and sex from the EB II on two experimental temperatures. D, E and F denote MNILs (the first letter marks mtDNA haplotype (MT), the second letter marks nuDNA background (NU)), F and M denote females and males, respectively (SEX). Error bars represent 95% confidence intervals.

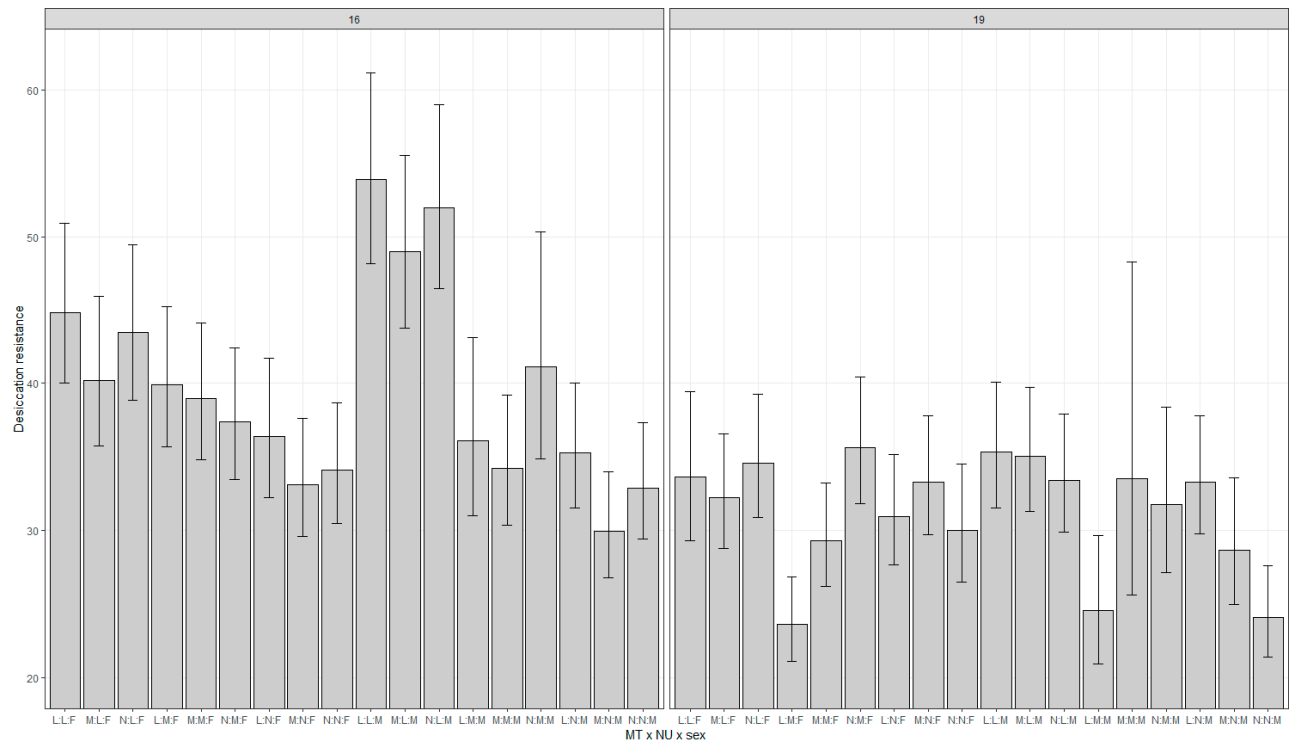

**Supplementary Figure S3.** Mean survival times in hours for the desiccation experiment for all combinations of genotypes and sex from the EB III on two experimental temperatures. L, M and N denote MNILs (the first letter marks mtDNA haplotype (MT), the second letter marks nuDNA background (NU)), F and M denote females and males, respectively (SEX). Error bars represent 95% confidence intervals.

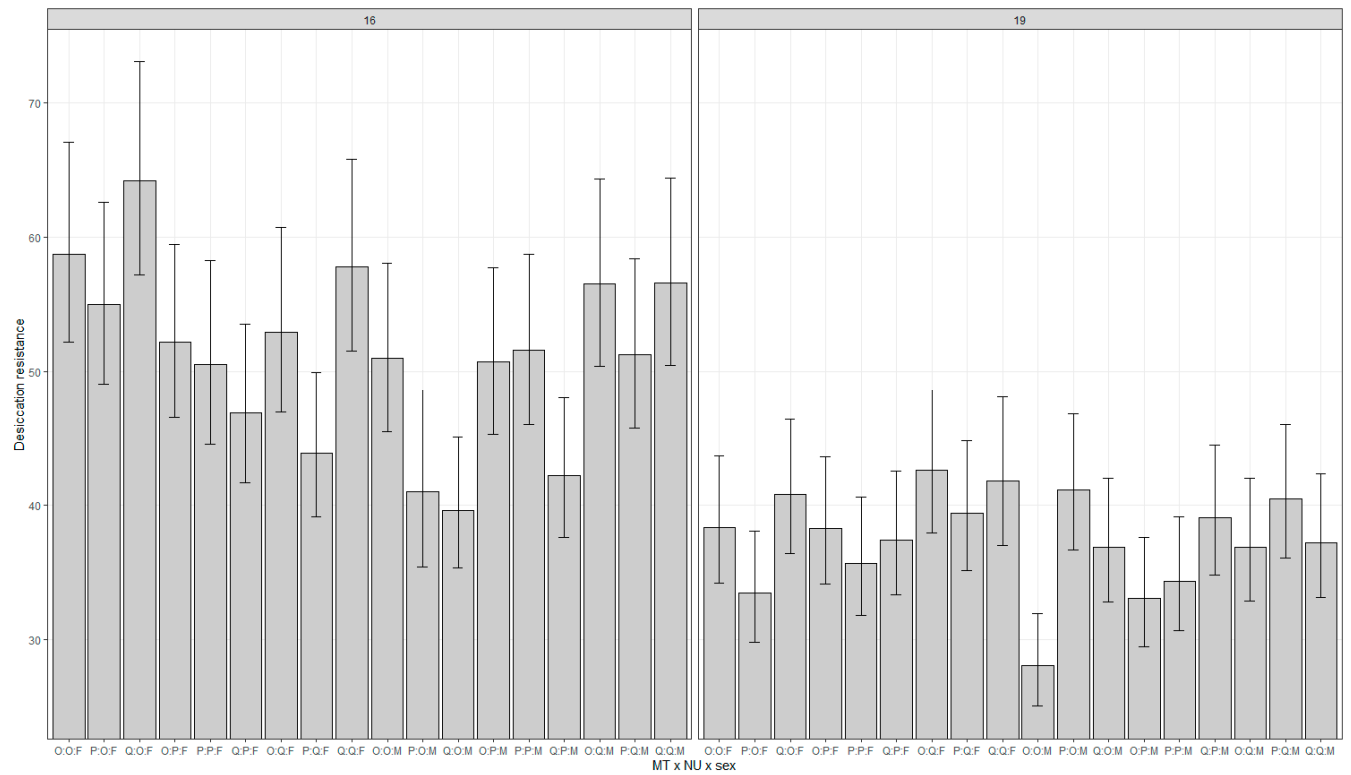

**Supplementary Figure S4.** Mean survival times in hours for the desiccation experiment for all combinations of genotypes and sex from the EB IV on two experimental temperatures. O, P and Q denote MNILs (the first letter marks mtDNA haplotype (MT), the second letter marks nuDNA background (NU)), F and M denote females and males, respectively (SEX). Error bars represent 95% confidence intervals.

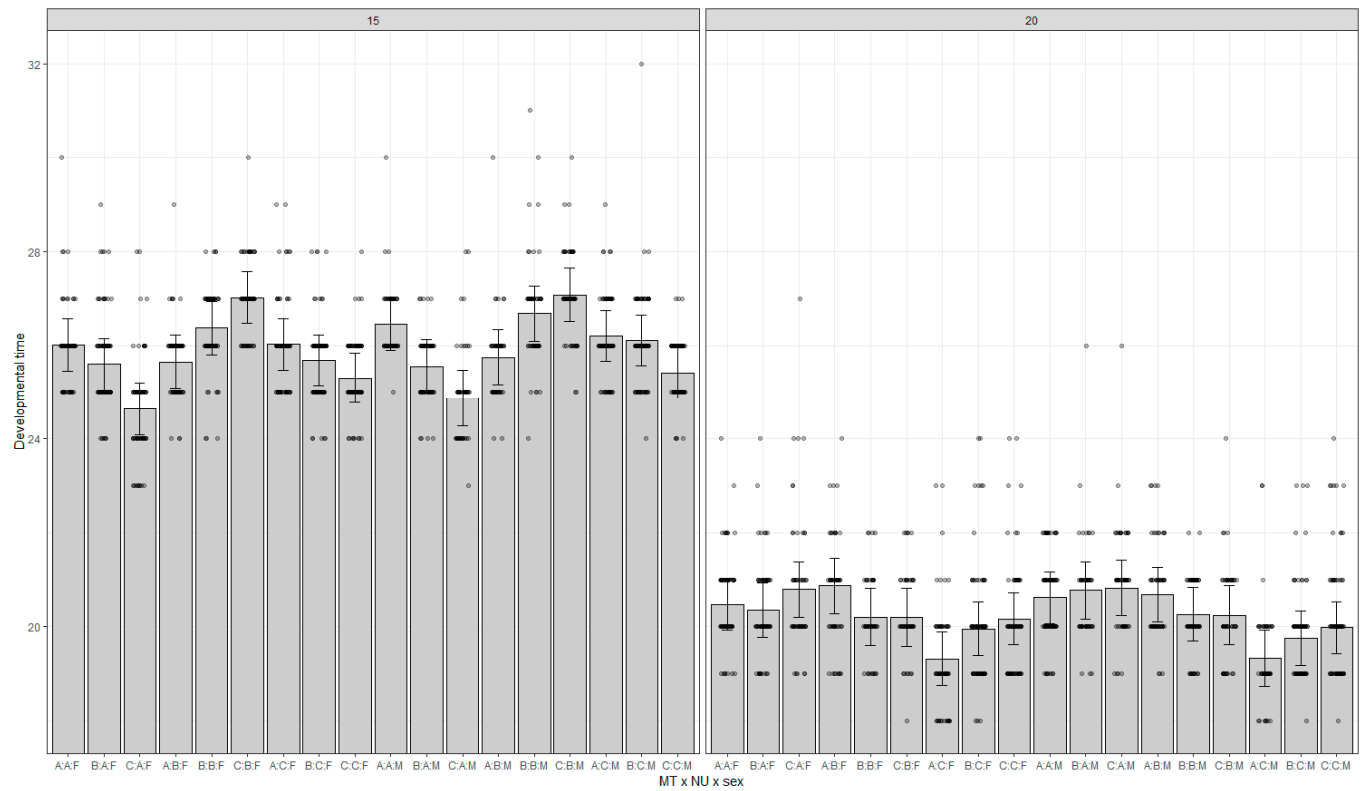

**Supplementary Figure S5.** Mean developmental times in days for all combinations of genotypes and sex from the EB I on two experimental temperatures. A, B and C denote MNILs (the first letter marks mtDNA haplotype (MT), the second letter marks nuDNA background (NU)), F and M denote females and males, respectively (SEX). Error bars represent 95% confidence intervals.

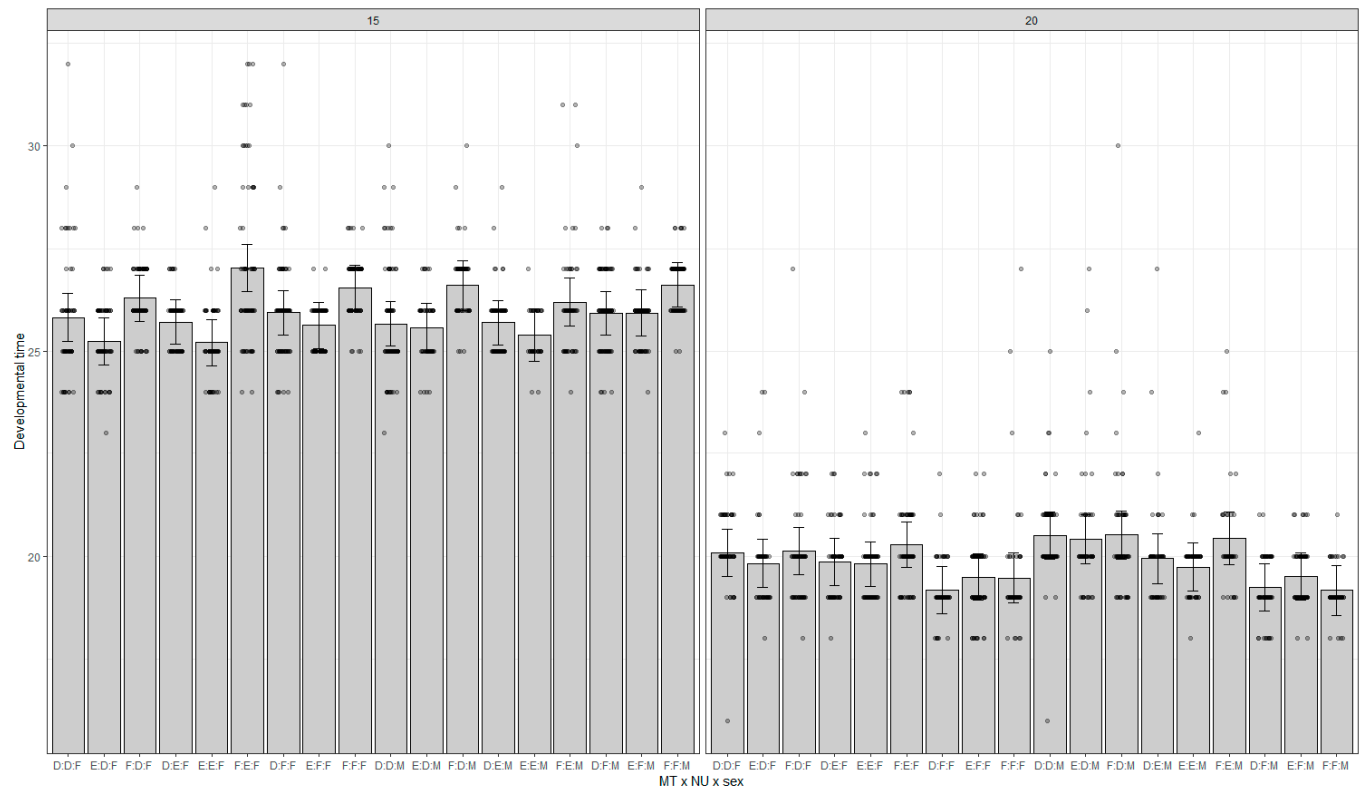

**Supplementary Figure S6.** Mean developmental times in days for all combinations of genotypes and sex from the EB II on two experimental temperatures. D, E and F denote MNILs (the first letter marks mtDNA haplotype (MT), the second letter marks nuDNA background (NU)), F and M denote females and males, respectively (SEX). Error bars represent 95% confidence intervals.

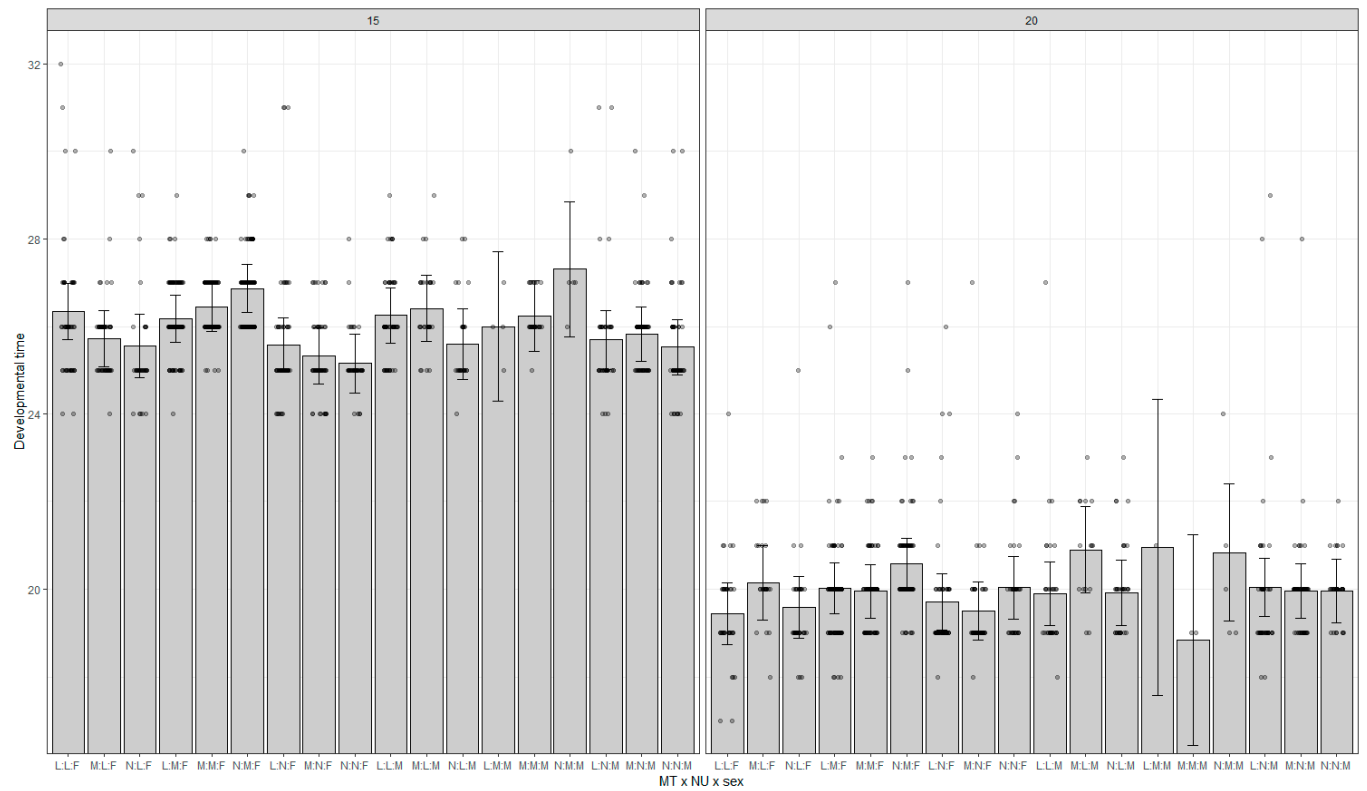

**Supplementary Figure S7.** Mean developmental times in days for all combinations of genotypes and sex from the EB III on two experimental temperatures. L, M and N denote MNILs (the first letter marks mtDNA haplotype (MT), the second letter marks nuDNA background (NU)), F and M denote females and males, respectively (SEX). Error bars represent 95% confidence intervals.

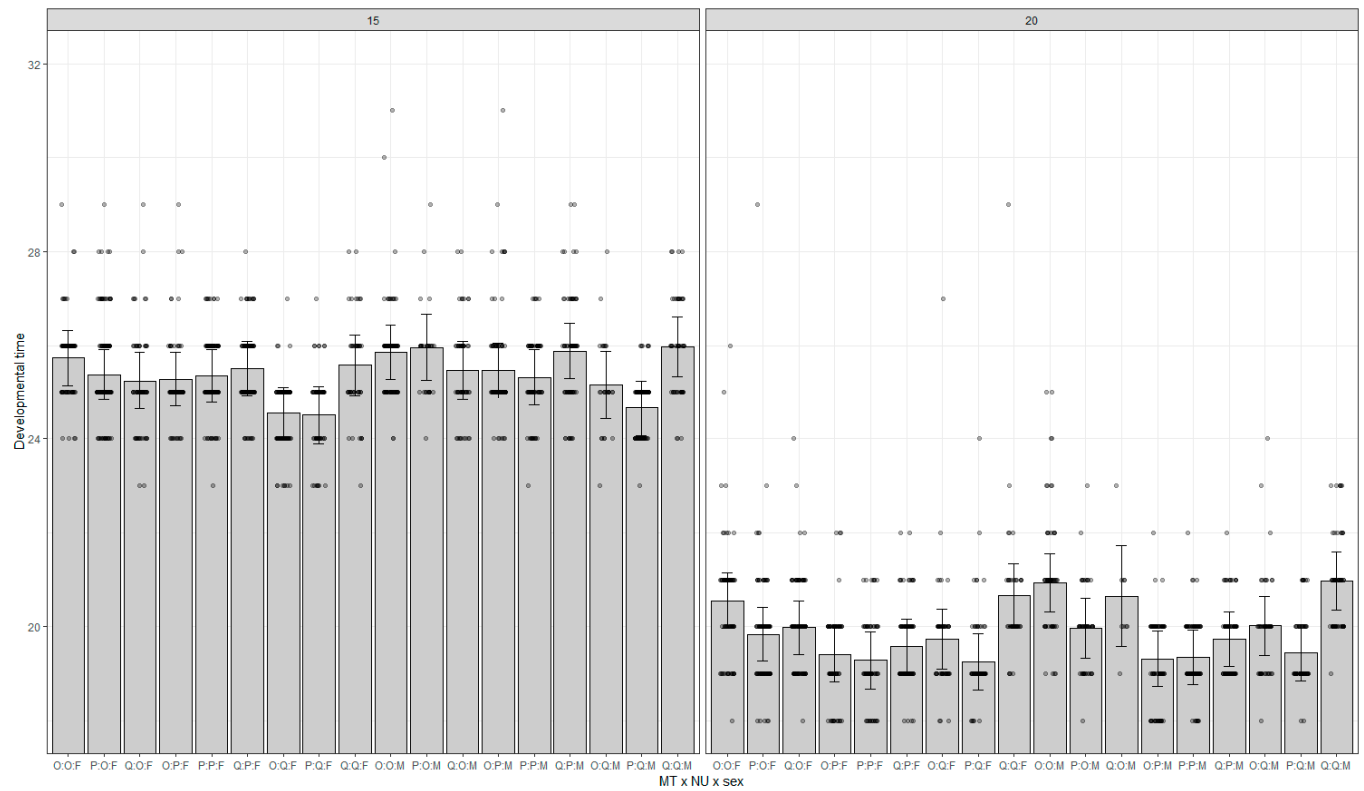

**Supplementary Figure S8.** Mean developmental times in days for all combinations of genotypes and sex from the EB IV on two experimental temperatures. O, P and Q denote MNILs (the first letter marks mtDNA haplotype (MT), the second letter marks nuDNA background (NU)), F and M denote females and males, respectively (SEX). Error bars represent 95% confidence intervals.



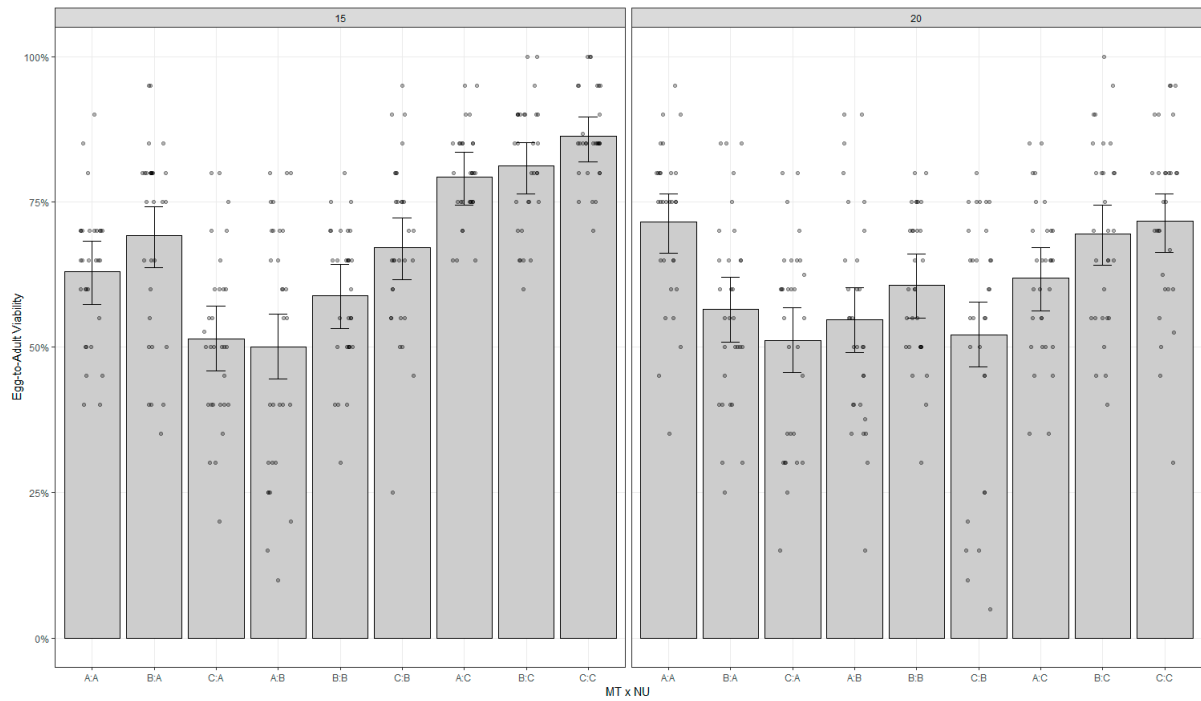

**Supplementary Figure S9.** Mean egg-to-adult viability scores for all combinations of genotypes from the EB I on two experimental temperatures. A, B and C denote MNILs (the first letter marks mtDNA haplotype (MT), the second letter marks nuDNA background (NU)). Error bars represent 95% confidence intervals.

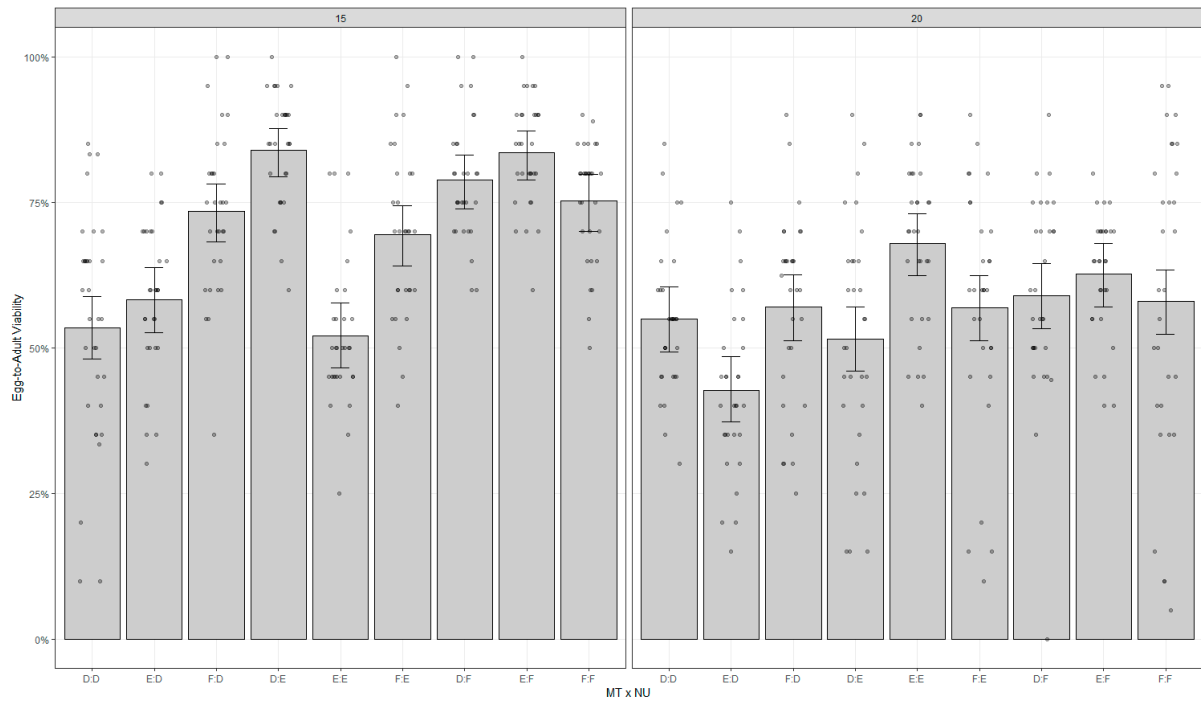

**Supplementary Figure S10.** Mean egg-to-adult viability scores for all combinations of genotypes from the EB II on two experimental temperatures. D, E and F denote MNILs (the first letter marks mtDNA haplotype (MT), the second letter marks nuDNA background (NU)). Error bars represent 95% confidence intervals.

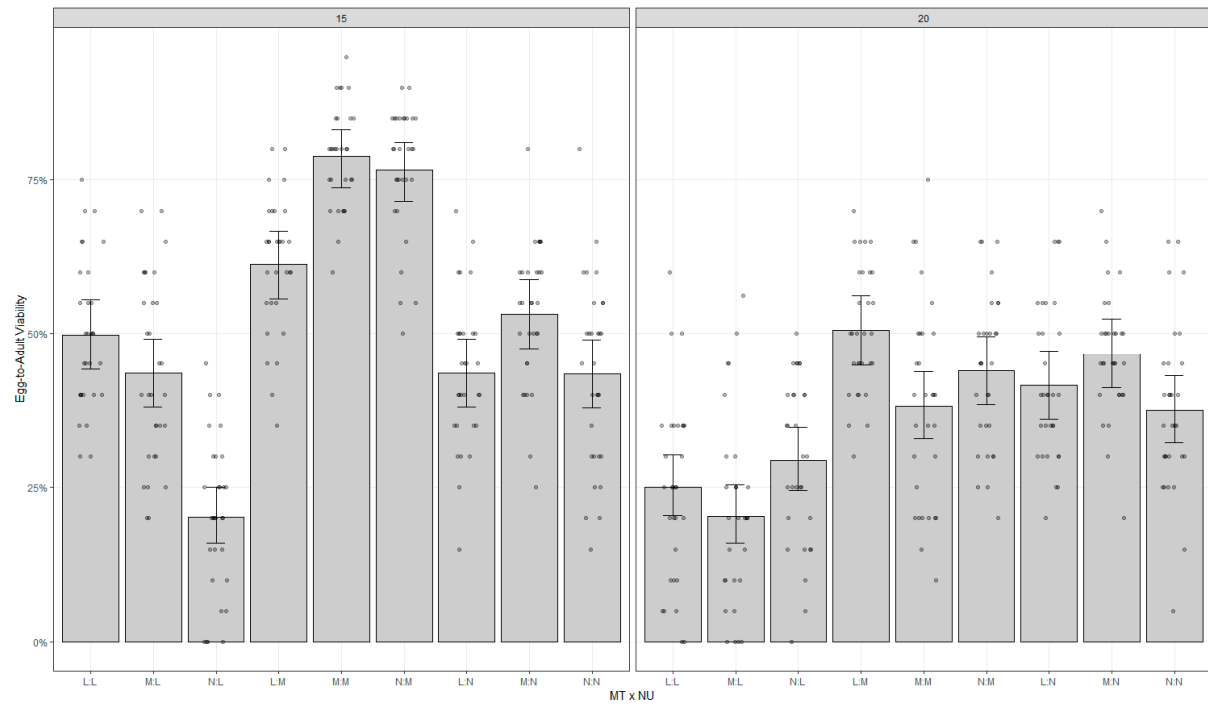

**Supplementary Figure S11.** Mean egg-to-adult viability scores for all combinations of genotypes from the EB III on two experimental temperatures. L, M and N denote MNILs (the first letter marks mtDNA haplotype (MT), the second letter marks nuDNA background (NU)). Error bars represent 95% confidence intervals.

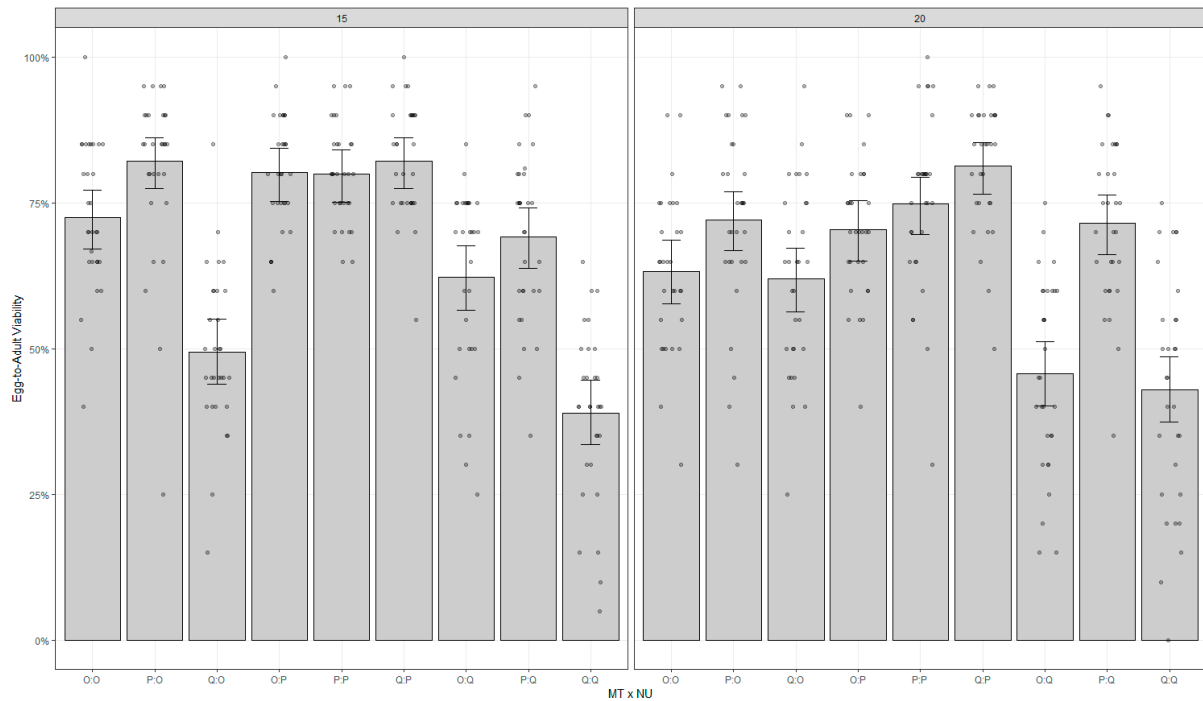

**Supplementary Figure S12.** Mean egg-to-adult viability scores for all combinations of genotypes from the EB IV on two experimental temperatures. O, P and Q denote MNILs (the first letter marks mtDNA haplotype (MT), the second letter marks nuDNA background (NU)). Error bars represent 95% confidence intervals.

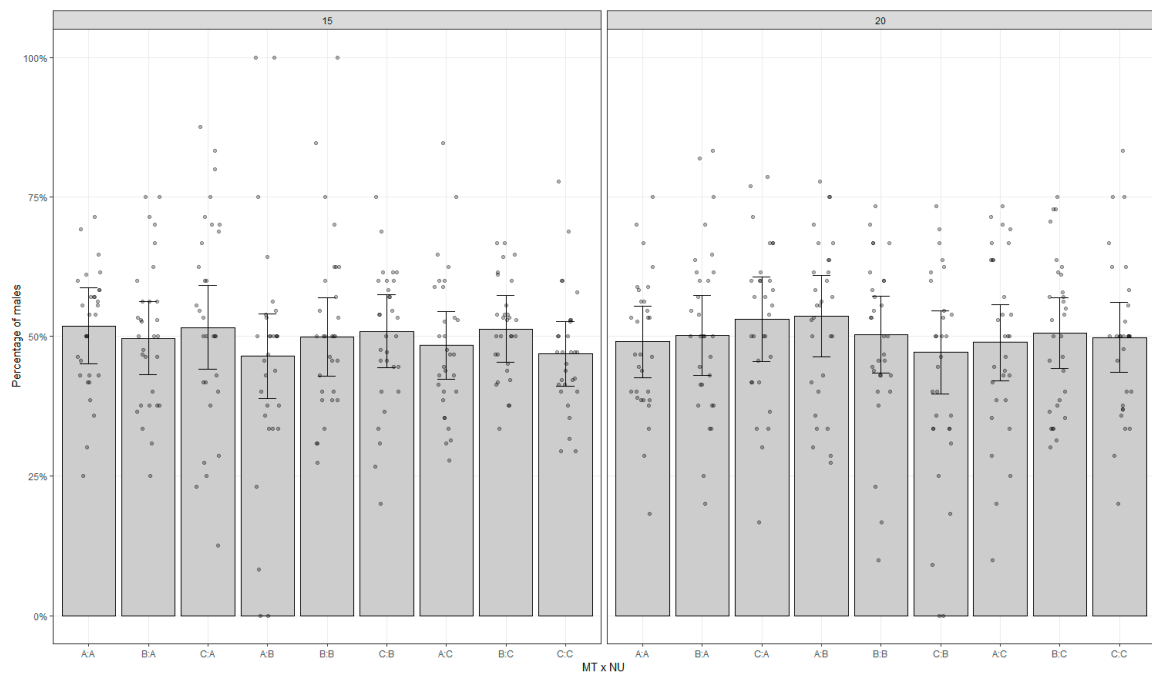

**Supplementary Figure S13.** Mean proportion of males for all combinations of genotypes from EB I on two experimental temperatures. A, B and C denote MNILs (the first letter marks mtDNA haplotype (MT), the second letter marks nuDNA background (NU)). Error bars represent 95% confidence intervals.

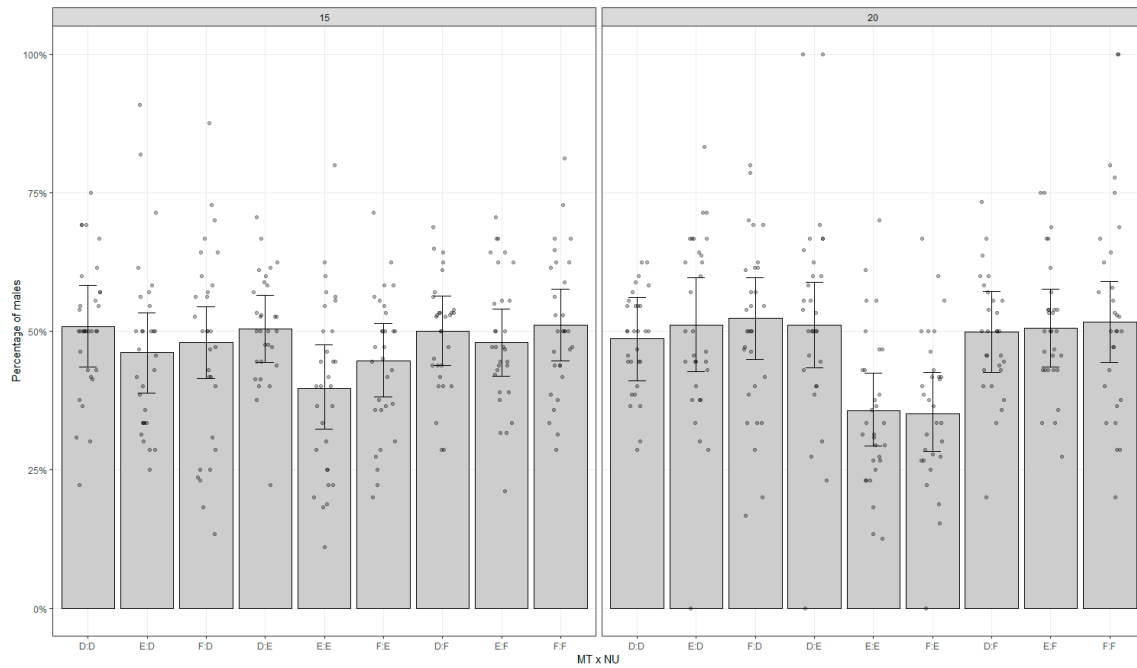

**Supplementary Figure S14.** Mean proportion of males for all combinations of genotypes from EB II on two experimental temperatures. D, E and F denote MNILs (the first letter marks mtDNA haplotype (MT), the second letter marks nuDNA background (NU)). Error bars represent 95% confidence intervals.

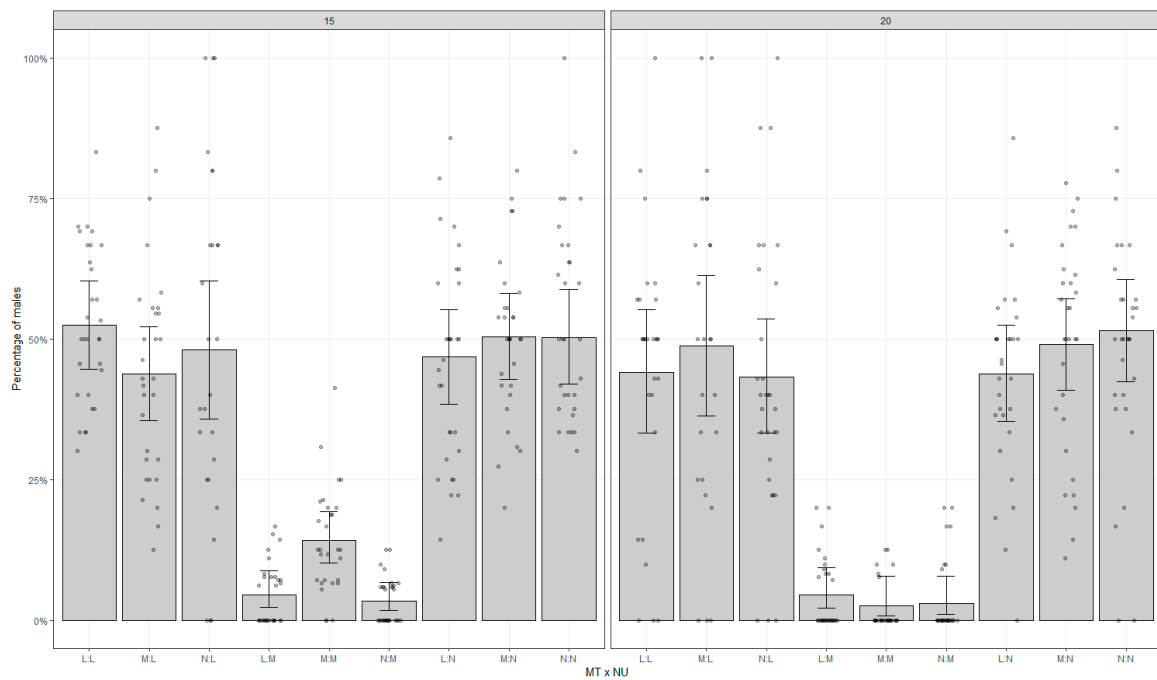

**Supplementary Figure S15.** Mean proportion of males for all combinations of genotypes from EB III on two experimental temperatures. L, M and N denote MNILs (the first letter marks mtDNA haplotype (MT), the second letter marks nuDNA background (NU)). Error bars represent 95% confidence intervals.

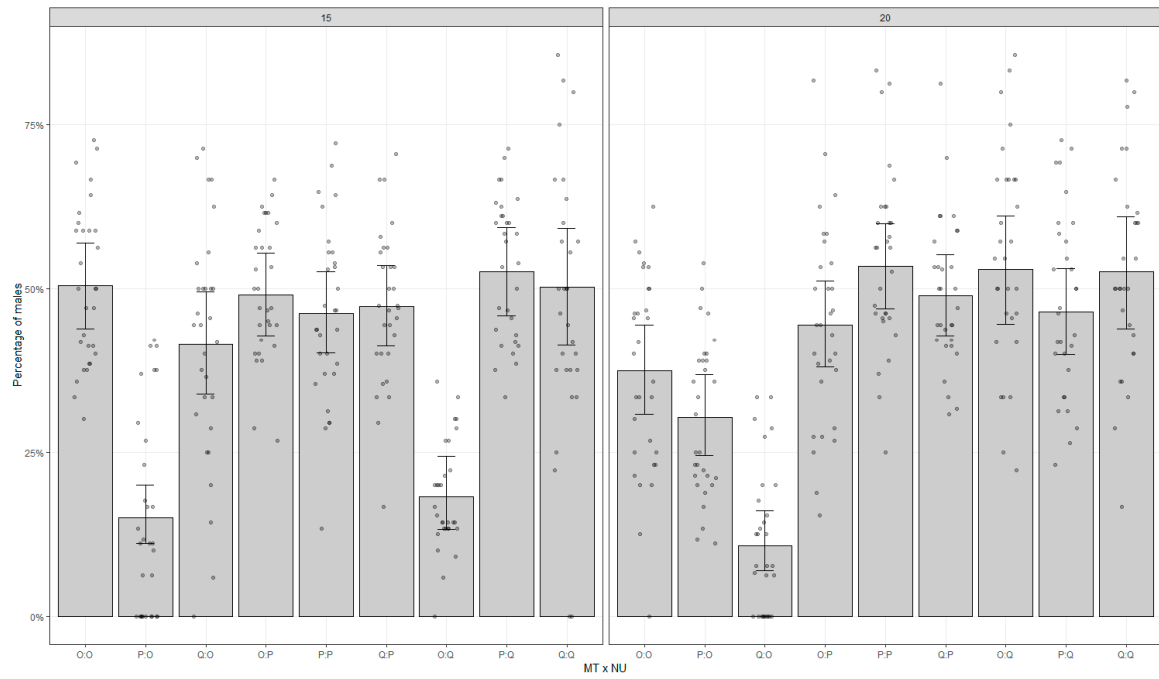

**Supplementary Figure S16.** Mean proportion of males for all combinations of genotypes from EB IV on two experimental temperatures. O, P and Q denote MNILs (the first letter marks mtDNA haplotype (MT), the second letter marks nuDNA background (NU)). Error bars represent 95% confidence intervals.
